# Supplementary material for: Combined differential scanning calorimetry and thermogravimetric analysis for thermochemical kinetic measurements
Source: PeerJ journal article supplement (doi:10.7717/peerj.8211), 1970-01-01
Supplement: Supplemental_Figure_6.pdf [file Supplemental_Figure_6.pdf]

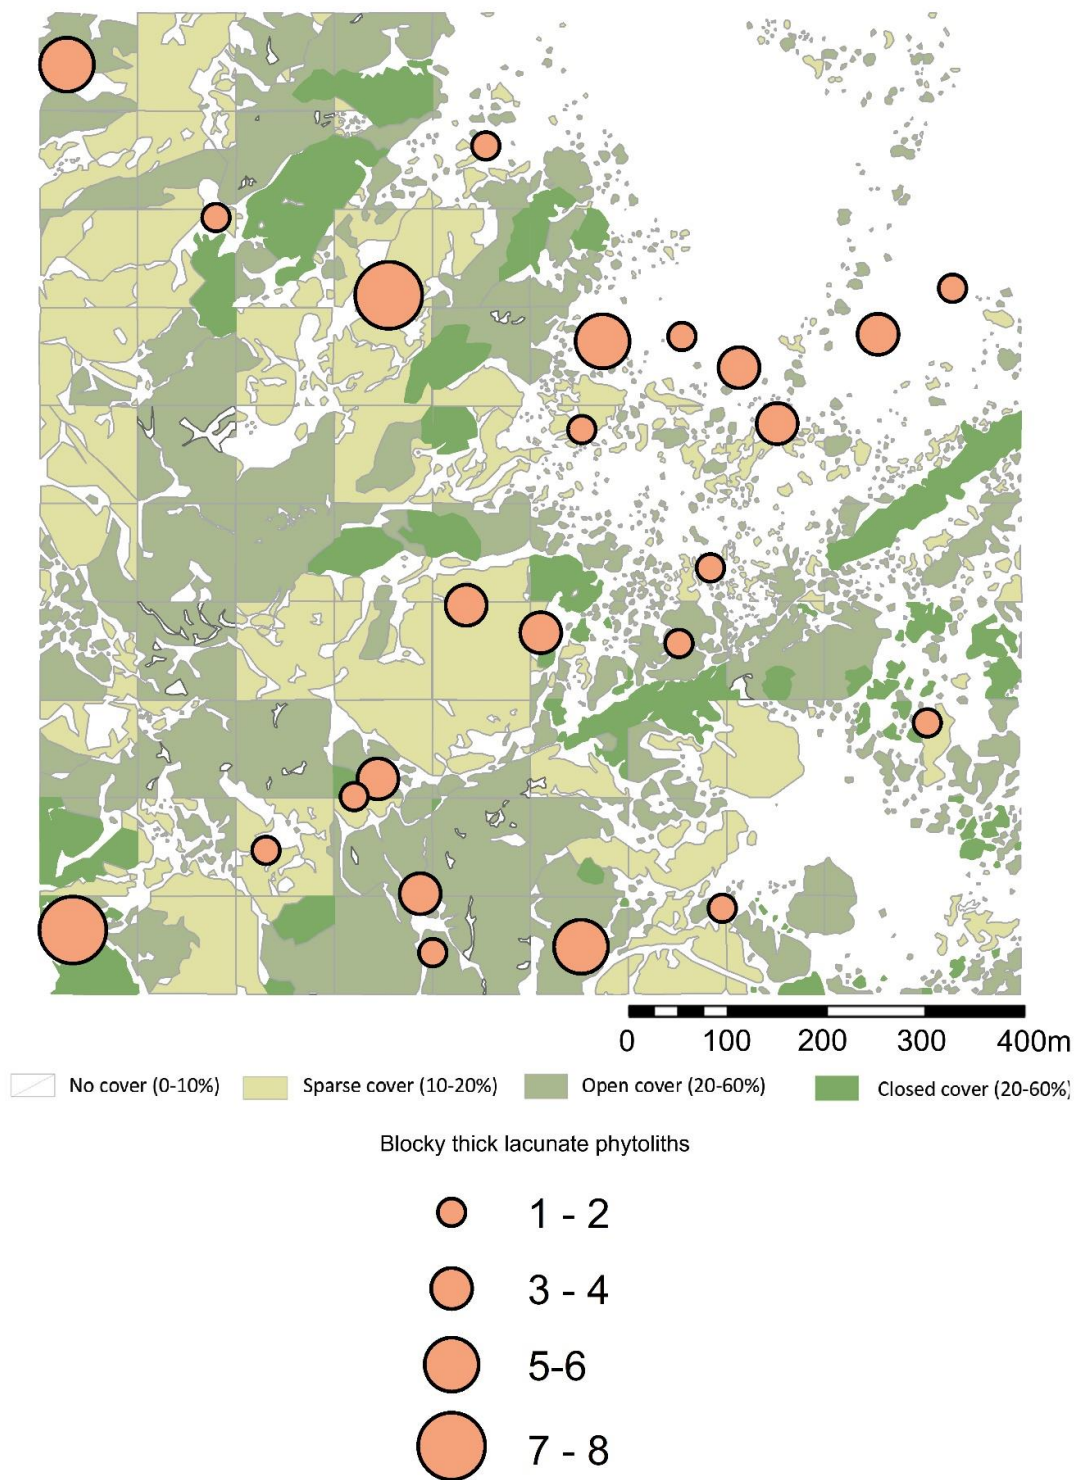

Supplemental Figure 6: Topsoil samples with presence of blocky thick lacunate morphotype.
